1 **Phosphorus stress induces the synthesis of novel glycolipids in *Pseudomonas***  
2 ***aeruginosa* that confer protection against a last-resort antibiotic**

3

4 **Running title:** ecophysiology of lipid renovation in *Pseudomonas aeruginosa*

5

6 Rebekah A. Jones<sup>1,2</sup>, Holly Shropshire<sup>2</sup>, Caimeng Zhao<sup>3</sup>, Andrew Murphy<sup>2</sup>, Ian Lidbury<sup>2,4</sup>,  
7 Tao Wei<sup>3</sup>, David J Scanlan<sup>2</sup>, Yin Chen<sup>2</sup>

8

9

10 <sup>1</sup>MRC Doctoral Training Partnership, University of Warwick, Coventry, CV4 7AL, UK.

11

12 <sup>2</sup>School of Life Sciences, University of Warwick, Coventry, CV7, 7AL, UK

13

14 <sup>3</sup>School of Food and Biological Engineering, Zhengzhou University of Light Industry,  
15 Zhengzhou, 450002, China

16

17 <sup>4</sup>Department of Animal and Plant Sciences, University of Sheffield, Sheffield, S10 1AE,  
18 UK

19

20

21 Correspondence to Yin Chen, (email, [y.chen.25@warwick.ac.uk](mailto:y.chen.25@warwick.ac.uk), phone 00 44 24  
22 76528976)

23

24 Classification: *Integrated genomics and post-genomics approaches in microbial ecology*

25 **Abstract**

26 *Pseudomonas aeruginosa* is a nosocomial pathogen with a prevalence in  
27 immunocompromised individuals and is particularly abundant in the lung microbiome of  
28 cystic fibrosis patients. A clinically important adaptation for bacterial pathogens during  
29 infection is their ability to survive and proliferate under phosphorus limited growth  
30 conditions. Here, we demonstrate that *P. aeruginosa* adapts to P-limitation by substituting  
31 membrane glycerophospholipids with sugar-containing glycolipids through a lipid  
32 renovation pathway involving a phospholipase and two glycosyltransferases. Combining  
33 bacterial genetics and multi-omics (proteomics, lipidomics and metatranscriptomic  
34 analyses), we show that the surrogate glycolipids monoglucosyldiacylglycerol and  
35 glucuronic acid-diacylglycerol are synthesised through the action of a new phospholipase  
36 (PA3219) and two glycosyltransferases (PA3218 and PA0842). Comparative genomic  
37 analyses revealed that this pathway is strictly conserved in all *P. aeruginosa* strains  
38 isolated from a range of clinical and environmental settings and actively expressed in the  
39 metatranscriptome of cystic fibrosis patients. Importantly, this phospholipid-to-glycolipid  
40 transition comes with significant ecophysiological consequence in terms of antibiotic  
41 sensitivity. Mutants defective in glycolipid synthesis survive poorly when challenged with  
42 polymyxin B, a last-resort antibiotic for treating multi-drug resistant *P. aeruginosa*. Thus,  
43 we demonstrate an intriguing link between adaptation to environmental stress (nutrient  
44 availability) and antibiotic resistance, mediated through membrane lipid renovation that is  
45 an important new facet in our understanding of the ecophysiology of this bacterium in the  
46 lung microbiome of cystic fibrosis patients.

## 47 **Introduction**

48 *P. aeruginosa* is a significant nosocomial pathogen in intensive care units causing  
49 pneumonia, surgical wound site infections and sepsis (1-2). It is now recognised as a  
50 leading cause of morbidity and mortality in chronically infected cystic fibrosis (CF) patients  
51 and immunocompromised individuals due to the surge of carbapenem resistant strains, a  
52 key group of first line antibiotics for treating *P. aeruginosa* infections (3). For these drug-  
53 resistant *P. aeruginosa* strains, a viable but not ideal treatment option are polymyxins,  
54 considered to be last resort antibiotics. Although polymyxins are active against *P.*  
55 *aeruginosa*, their use was originally discontinued due to concerns over toxicity (4). Indeed,  
56 *P. aeruginosa* has started to develop mechanisms of resistance to polymyxins due to an  
57 increase in their use globally. These primarily include modifications to the  
58 lipopolysaccharide (LPS) layer of the outer membrane through the addition of 4-amino-4-  
59 deoxy-L-arabinose (L-Ara4N) or phosphoethanolamine (pEtN) (5-6). These changes  
60 perturb the electrostatic interaction between cationic polymyxins and the normally  
61 negatively charged LPS.

62

63 Glycerophospholipids, such as phosphatidylglycerol (PG) and phosphatidylethanolamine  
64 (PE), are the major lipids forming the membrane lipid bilayer in bacteria, archaea and  
65 eukaryotes (7-11). They play a fundamental role in the evolution of the cell and it is widely  
66 accepted that the last universal common ancestor possessed a phospholipid membrane  
67 (12-13). Although it is uncertain why evolution selected glycerophospholipids as the  
68 building blocks for maintaining cellular membranes (13), it is known that organisms can  
69 alter their membrane lipid composition in response to nutrient stress or environmental  
70 changes (7, 14). Previous studies have firmly established the link between nutrient stress,  
71 particularly phosphorus availability, and the expression of a variety of virulence factors in  
72 *P. aeruginosa* (15-19). However, it is unclear whether adaptation to phosphorus limitation

73 in this bacterium causes a change in membrane lipid composition and, if so, whether lipid  
74 remodelling comes with unforeseen ecophysiological consequences. Using a synthesis of  
75 multi-omics approaches, here we show that *P. aeruginosa* produces surrogate glycolipids  
76 to replace phospholipids in response to phosphorus limitation. These glycolipids  
77 have not previously been reported in *P. aeruginosa*. This lipid renovation pathway is  
78 strictly conserved in all *P. aeruginosa* strains isolated from a range of clinical settings and  
79 actively expressed in the metatranscriptome of cystic fibrosis patients. Importantly, such  
80 a phospholipid-to-glycolipid transition comes with a significant consequence in antibiotic  
81 sensitivity, in that glycolipids confer protection when challenged with the antimicrobial  
82 peptide polymyxin B. As such, glycolipid-mediated resistance to polymyxin B represents  
83 a new resistance mechanism that is quite different from the previously documented  
84 modification of LPS (5-6). This work highlights how the physiological adaptation of  
85 *Pseudomonas aeruginosa* to phosphorus limitation can mediate a physiological response  
86 that may have profound implications for the survival of the bacteria in the lung microbiome.

87

88

## 89 **Materials and methods**

### 90 **Cultivation of *P. aeruginosa* and mutants**

91 *P. aeruginosa* strain PAO1 was obtained from the DSMZ culture collection (Germany) and  
92 routinely cultured in lysogeny broth (LB). A defined medium previously outlined for  
93 *Pseudomonas* species to control phosphate levels was also used (20). This modified  
94 minimal media A comprised: Na-succinate 20 mM, NaCl 200 mg L<sup>-1</sup>, NH<sub>4</sub>Cl 450 mg L<sup>-1</sup>,  
95 CaCl<sub>2</sub> 200 mg L<sup>-1</sup>, KCl 200 mg L<sup>-1</sup>, MgCl<sub>2</sub> 450 mg L<sup>-1</sup>, with trace metals FeCl<sub>2</sub> 10 mg L<sup>-1</sup>  
96 and MnCl<sub>2</sub> 10 mg L<sup>-1</sup>, with 10 mM 4-(2-hydroxyethyl)-1-piperazineethanesulfonic acid  
97 (HEPES) buffer used at pH 7. Na<sub>2</sub>HPO<sub>4</sub> was then added to a final concentration of 50 μM  
98 (low P) or 1 mM (high P). An intermediate phosphate source of 400 μM Na<sub>2</sub>HPO<sub>4</sub> was

99 used for overnight cultures in some experiments to prevent any excess storage of  
100 phosphate that could hamper results. All components were filter sterilised using 0.22 µm  
101 pore-size filters, and made up using double deionised H<sub>2</sub>O. Mutants were obtained from  
102 the *P. aeruginosa* strain PAO1 transposon mutant library at the University of Washington,  
103 and confirmed using PCR and subsequent sequencing.

104

### 105 **Alkaline phosphatase assay**

106 Alkaline phosphatase activity was monitored as a measure of Pi stress. Liquid *P.*  
107 *aeruginosa* culture samples were incubated with 10 mM *para*-nitrophenol phosphate  
108 (pNPP) to a final concentration of 1 mM. Yellow-pNP supernatant was measured in  
109 triplicate at 407 nm (BioRad iMark microplate reader). Readings were normalised using  
110 both a Tris-only incubation control and further by bacterial density (optical density reading  
111 at 600 nm (OD<sub>600</sub>)).

112

### 113 **Over-expression of Agt1 and Agt2 in *E. coli***

114 *P. aeruginosa* genes PA3218 (*agt1*) and PA0842 (*agt2*) were codon optimised for *E. coli*  
115 and chemically synthesised (GenScript) into plasmid pET-28a(+). *E. coli* BLR(DE3)  
116 competent cells were thawed for 5 minutes before incubation with 10 ng pET-28a\_Agt  
117 plasmid, and placed on ice for 5 minutes. Cells were then subjected to heat shock at 42°C  
118 for 30 seconds, placed back on ice for 2 minutes. Recovery SOC media was added, with  
119 samples incubated at 37°C shaking, for 1 hour. Transformed cells were then plated onto  
120 kanamycin-LB agar and grown overnight at 37°C. To harvest cells for lipid extraction,  
121 single colonies were picked to grow in small volume LB-Kan to 0.6 OD<sub>600</sub> before induction  
122 with 0.4 mM IPTG overnight at 25°C. 1 mL samples were then pelleted at 10,000 x *g* for  
123 5 minutes. Pellets were stored at -80°C until lipid extraction and subsequent analysis on  
124 HPLC-MS.

125 To purify the Agt1 and Agt2 proteins from recombinant *E. coli*, IPTG was added to  
126 a final concentration of 0.5 mM once the cultures reached an OD<sub>600</sub> of 0.6. After a further  
127 12 h of growth at 30°C, cells were harvested by centrifugation and resuspended in buffer  
128 A containing 50 mM Tris-HCl, pH 7.9, 50 mM NaCl. Cells were disrupted by sonication  
129 and 1% (w/v) triton X-100 was then added and the cells were then incubated for 2.5 hr at  
130 4°C. The cells were then centrifuged at 12,000 × *g* for 20 min, and the soluble fraction  
131 was loaded onto a nickel column (GE Healthcare, USA) pre-equilibrated with buffer A. The  
132 recombinant Agt1 and Agt2 enzymes were eluted with an elution buffer (20 mM Tris-HCl,  
133 pH 7.9, 500 mM NaCl, 300 mM imidazole) and dialyzed overnight into buffer A to remove  
134 imidazole. For further purification, the samples were dialyzed overnight into buffer B  
135 containing 50 mM Tris-HCl, pH 7.9, 200 mM NaCl, concentrated by ultrafiltration using a  
136 30-kDa membrane (Millipore), and loaded onto a Superdex 200 (16/60) gel filtration  
137 column (GE Healthcare, USA), which was pre-equilibrated with buffer B (50 mM Tris-HCl,  
138 pH 7.9, 200 mM NaCl). The fraction size was 0.5 ml, and the flowrate was 0.5 ml/min.  
139 Purified protein was analysed by SDS-PAGE, and protein concentrations were determined  
140 using the Bradford assay.

141

#### 142 **Membrane lipid extraction and HPLC-MS analysis**

143 Intact polar membrane lipids were extracted using a modified version of the typically used  
144 Folch extraction method (21, 22). Liquid *P. aeruginosa* cultures growing in high and low  
145 phosphate modified minimal medium A were sampled after 8 hrs, collecting the equivalent  
146 of 0.5 OD<sub>600</sub> into a 2 mL glass chromacol vial (Thermo Scientific), pelleted at 4°C, 4,000  
147 rpm for 15 minutes. For lipid extraction, a ratio of 500:300:1000 µL of  
148 methanol:water:chloroform (all LC-MS grade) was used. The lipid fraction was collected  
149 from the lower phase using a glass Pasteur pipette. This chloroform extract was then dried  
150 under a stream of nitrogen (Techne sample concentrator) and resuspended in 1 mL 95%

151 (v/v) acetonitrile (HPLC grade): 5% (w/v) ammonium acetate (10 mM, pH 9.2) for analysis.  
152 Extracted lipid samples were analysed using an UltiMate 3000 HPLC (Thermo Scientific)  
153 system coupled to an AmazonSL quadrupole ion trap (Bruker) mass spectrometer (MS),  
154 using electrospray ionisation. Hydrophilic interaction chromatography (HILIC) using a  
155 BEH amide XP column (Waters) was utilised to separate lipid classes based on their head  
156 group (35). The column chamber was maintained at 30°C and the samples passed  
157 through at a 150  $\mu\text{L min}^{-1}$  flow rate. The mobile phase of acetonitrile:ammonium acetate  
158 (pH 9.2) was used to elute the sample in a 15 minute per sample gradient, from 95% to  
159 28% ammonium acetate. The lipid d17:1/12:0 sphingosylphosphoethanolamine (Sigma-  
160 Aldrich, 50 nM) was added to the samples and used as an internal standard. Tandem MS  
161 (or MS<sup>n</sup>) was used to fragment the intact lipids for identification. The data were analysed  
162 using the Bruker Compass software package (DataAnalysis and QuantAnalysis).

163

#### 164 **Enzyme activity assays**

165 The glycosyltransferase activity of Agt1 and Agt2 was measured using uridine  
166 diphosphate (UDP)-glucose or UDP-glucuronic acid and 0.1 mM C16:0/C18:1  
167 diacylglycerol (DAG) as the substrate. 2.0  $\mu\text{M}$  purified enzyme was used in 10 mM  
168 Tricine/KOH buffer, pH 8.5 with 2 mM dithiothreitol. The resulting mixture (500  $\mu\text{l}$ ) was  
169 incubated at 30°C for 60 min with constant shaking at 200 rpm. The lipid products were  
170 extracted using the Folch method as described above. The lipid extracts were further  
171 analysed by LC-MS for the identification of MGDG/GADG through MS<sup>n</sup> fragmentation and  
172 for the quantification of DAG against standards. The  $K_m$  and  $V_{max}$  values were calculated  
173 using Michaelis-Menten plots with various concentrations of UDP-sugars (0.1 to 1.0 mM)  
174 in three replicates.

175

#### 176 **Antibiotic sensitivity assays**

177 *P. aeruginosa* cultures were grown to an OD<sub>600</sub> of 0.6 in high or low phosphate minimal  
178 media A (see above). Cultures were then diluted 1:100 in prewarmed minimal media A  
179 containing 4 µg mL<sup>-1</sup> polymyxin B sulfate (Sigma). Samples were incubated at 37°C, 180  
180 rpm, and assayed for survivors at specified time points by serial dilution plating onto LB.  
181 *E. coli* cultures containing pET-28a-Agt1 or pET-28a-Agt2 were grown to an OD<sub>600</sub> of 0.6  
182 in LB broth, and the expression of Agt1 and Agt2 was induced by incubation with 0.4 mM  
183 IPTG overnight at 25°C. A negative control of *E. coli* containing the pET-28a vector only  
184 was also set up. Overnight cultures were diluted 1:100 in prewarmed LB broth containing  
185 0.4 mM IPTG and 20 µg mL<sup>-1</sup> polymyxin B sulfate (Sigma). Samples were incubated at  
186 37°C, 180 rpm, and assayed for survivors at specified time points by serial dilution plating  
187 onto LB agar + kanamycin 25 µg mL<sup>-1</sup>.

188

### 189 **Comparative proteomic analysis**

190 *P. aeruginosa* PAO1 WT (1 mM phosphate, 50 µM phosphate) and PlcP mutant (50 µM  
191 phosphate) cell pellets in three biological replicates were resuspended in LDS (lithium  
192 dodecyl sulfate) sample buffer containing 1% β-mercaptoethanol before lysing at 95°C  
193 and vortexing. 30 µL of each sample were run on NuPAGE 10% Bis-Tris protein gel  
194 (Invitrogen) for a short time before staining with SafeStain (Thermo Fisher) and excising  
195 the whole protein band. In-gel proteins were de-stained using 50% (v/v) ethanol, 50 mM  
196 ammonium bicarbonate (ABC), before being reduced and alkylated for 5 min at 70°C using  
197 10 mM TCEP (tris(2-carboxyethyl)phosphine) and 40 mM CAA (2-chloroacetamide),  
198 respectively. After washing with 50% (v/v) ethanol 50 mM ABC, peptides were lysed  
199 overnight using trypsin. Finally, peptides were extracted by sonication in a water bath (10  
200 min at room temperature), concentrated using a Speed-Vac (50 mins) and resuspended  
201 in 2.5% acetonitrile 0.05% formic acid. Extracted peptides were analysed by nanoLC-ESI-  
202 MS/MS using the Ultimate 3000/Orbitrap Fusion instrumentation (Thermo Scientific). The



203 UniProt proteome for *P. aeruginosa* strain PAO1 was used for peptide analysis. Further  
204 data analysis was carried out using MaxQuant and Perseus software as described  
205 previously; peptides without triplicate measures were filtered out (23). Comparative  
206 proteomics data are presented in Supplementary Tables S1 and S3.

207

## 208 **Phylogenomics and metatranscriptomics analyses**

209 The protein sequences of PA3219, PA3218 and PA0842 were used to search genome  
210 sequences of *Pseudomonas* clades in the JGI IMG genome portal  
211 (<https://img.jgi.doe.gov/>). Note that the PA3218 protein is incorrectly annotated in the  
212 genome of PAO1. The putative glycosyltransferase located immediately downstream of  
213 PA3219 was manually inspected by aligning to the corresponding gene (PA14\_22600) in  
214 the genome of *P. aeruginosa* PA14. To identify PA3218 in misannotated *P. aeruginosa*  
215 genomes, the nucleotide sequence immediately downstream of PA3219 was aligned with  
216 *agt1* in strain PA14, (locus tag PA14\_22600). The phylogeny of *Pseudomonas* clades was  
217 determined using the nucleotide sequences of six housekeeping genes (*rpoB*, *rpoD*,  
218 *dnaE*, *recA*, *atpD*, *gyrB*) retrieved from each genome using IQ-Tree with the parameters -  
219 m TEST -bb 1000 -alrt 1000. The most suitable model was chosen by the software.  
220 Evolutionary distances were inferred using maximum-likelihood analysis. Relationships  
221 were visualised using the online platform the Interactive Tree of Life viewer  
222 (<https://itol.embl.de/>). The conserved Pho box sequence was predicted using the MEME  
223 server (24).

224 The metatranscriptomics datasets of sputum samples obtained from a CF patient  
225 7-days (SRX5145606) and 8-days (SRX5145605) before death (25), CF patient G  
226 (SRR6833349) from Denmark (26) and a patient (SRR6833340) with chronic wound  
227 infection (26) were retrieved from the short reads archive (SRA) database  
228 (<https://www.ncbi.nlm.nih.gov/sra>). The reads were downloaded using fastq-dump and

229 mapped using the BMap aligner as described previously (27). Briefly, the SRA reads  
230 were mapped to the genome sequence of *P. aeruginosa* PAO1 using a stringent cut-off  
231 of  $\text{minid}=0.97$ . Relative abundance data were compared using RPKM (reads per kilobase  
232 of transcript, per million mapped reads). The list of RPKM abundance of individual genes  
233 of *P. aeruginosa* PAO1 is shown in **Suppl. Table S4**.

234

235

## 236 **Results and discussion**

### 237 ***P. aeruginosa* produces novel glycolipids in response to Pi stress**

238 To determine changes in the membrane lipidome in response to P-stress, the model *P.*  
239 *aeruginosa* strain PAO1 was grown in minimal medium under high (1 mM) or low Pi (50  
240  $\mu\text{M}$ ) conditions (**Figure 1a**). The latter condition elicited strong alkaline phosphatase  
241 activity, measured through the liberation of *para*-nitrophenol (*p*NP) from *para*-nitrophenol  
242 phosphate (*p*NPP) (**Figure 1b**), this being a strong indication that cells were P-stressed.  
243 Analysis of membrane lipid profiles using high performance liquid chromatography  
244 coupled to mass spectrometry (HPLC-MS) revealed the presence of several new lipids  
245 under Pi stress conditions (**Figure 1c**). Thus, during Pi-replete growth (1 mM phosphate),  
246 the lipidome is dominated by two glycerophospholipids: phosphatidylglycerol (PG, eluted  
247 at 6.8 min) and phosphatidylethanolamine (PE, eluted at 12.2 min). During Pi-stress a lipid  
248 species with mass to charge ratio ( $m/z$ ) of 623 and 649 were also found, with MS  
249 fragmentation resulting in a 131  $m/z$  peak, a diagnostic ion for the amino-acid containing  
250 ornithine lipid. This is consistent with previous reports of ornithine lipids in the *P.*  
251 *aeruginosa* membrane in response to Pi stress (28-29).

252 Further to ornithine lipids, three unknown lipids eluting at 7.7 min, 8.7 min and 9.8  
253 min, were only present under Pi stress conditions (**Figure 1c**). Using several rounds of  
254 MS fragmentation ( $\text{MS}^n$ ), with a quadrupole ion trap MS, fragmentation patterns

255 characteristic of glycolipids were found for all three peaks. For each peak of interest, the  
256 most predominant lipid masses of 774.7  $m/z$ , 786.8  $m/z$  and 788.6  $m/z$  were analysed by  
257 MS<sup>n</sup> in positive ionisation mode (**Figure 1d**). In each case, an initial head group was lost  
258 leaving a significant signal of 595.6  $m/z$ , the mass of the glycolipid building block  
259 diacylglycerol (DAG). Further fragmentation leads to the loss of either fatty acyl chain from  
260 DAG, leaving monoacylglycerols of 313.2  $m/z$  and 339.3  $m/z$ . Two monoacylglycerols with  
261 different masses are produced as a result of the original lipid containing 16:0 and 18:1  
262 fatty acids (313.2  $m/z$  and 339.3  $m/z$  monoacylglycerols, respectively). To further elucidate  
263 the identity of the peaks, a search for a neutral loss of a polar head group was carried out.  
264 Thus, the intact masses of 774.7  $m/z$  and 788.6  $m/z$  in positive ionisation mode leads to  
265 the loss of a head group of -179 and -193  $m/z$ , which corresponds to a hexose- and a  
266 glucuronate- group, respectively (**Figure 1d**), suggesting the occurrence of novel  
267 monoglucosyldiacylglycerol (MGDG) and glucuronic acid diacylglycerol (GADG)  
268 glycolipids in *P. aeruginosa*. The third glycolipid peak at 8.7 min remains an unknown lipid  
269 with intact mass of 786.8  $m/z$  (hereafter designated as a putative unknown glycolipid,  
270 UGL). Together, these data confirm the production of new glycolipids in *P. aeruginosa* in  
271 response to Pi stress.

272

### 273 **Comparative proteomics uncover the lipid renovation pathway in *P. aeruginosa***

274 To determine the proteomic response of *P. aeruginosa* to phosphorus limitation, and  
275 identify the genes involved in glycolipid formation, strain PAO1 was cultivated under high  
276 and low Pi conditions for 8 hours and the cellular proteome then analysed. A total of 2844  
277 proteins were detected, 175 of which were found to be differentially regulated by Pi  
278 availability (**Figure 2b, Suppl. Table S1**). In line with previous transcriptomic studies of  
279 strain PAO1 (18), major phosphorus acquisition mechanisms were highly expressed

280 under Pi stress conditions, e.g. the Pi-specific transporter PstSCAB, the two-component  
281 regulator PhoBR (**Suppl. Table S1**) (30).

282 Comparative proteomics also identified several genes which are likely important  
283 for membrane lipid remodelling (**Figure 2a**) including PA3219 (4.6-fold increase under Pi-  
284 depleted conditions, FDR<0.01), encoding a putative phospholipase C protein, and  
285 PA0842 (4-fold increase under Pi-depleted conditions, FDR<0.01), encoding a putative  
286 glycosyltransferase (**Figure 2b**). PA3219 has 47% protein sequence identity to PlcP from  
287 *Phaeobacter* sp. MED193 and 46% identity to PlcP from *Sinorhizobium meliloti* (25-27).  
288 In these bacteria, PlcP is essential in the lipid remodelling pathway for the formation of the  
289 diacylglycerol (DAG) backbone, representing the essential intermediate for the production  
290 of glycolipids (31-32). In *P. aeruginosa* PAO1, PA3219 appears to form an operon with  
291 PA3218, a putative glycosyltransferase likely under the control of the PhoBR two  
292 component system, as a highly conserved Pho box sequence was recognisable in the  
293 promoter region (**Figure 2c**). PA3218 (hereafter referred to as Agt1) has 41% protein  
294 sequence identity to the Agt of *Phaeobacter* sp. MED193. PA0842 showed 35% identity  
295 to the Agt of *Phaeobacter* sp. MED193 and a Pho box sequence is also found in its  
296 promoter region. This corroborates the finding that the PA0842 protein (hereafter referred  
297 to as Agt2) was significantly upregulated under Pi-depleted conditions (**Figure 2b**). In  
298 summary, comparative proteomic analysis suggests that *P. aeruginosa* PAO1 adopts this  
299 PlcP-Agt lipid remodelling pathway for the production of glycolipids in response to Pi-  
300 stress (**Figure 2a**).

301

302 **The PlcP-Agt mediated lipid renovation pathway is strictly conserved in *P.***  
303 ***aeruginosa* and actively transcribed in the metatranscriptomes of cystic fibrosis**  
304 **patients**

305 To uncover how widespread this predicted PlcP-Agt lipid remodelling pathway is amongst  
306 the genus *Pseudomonas*, including *P. aeruginosa* strains, we conducted a thorough  
307 comparative genomics analysis of these lipid renovating loci. PlcP-Agt is strictly conserved  
308 in all 770 genome-sequenced *P. aeruginosa* strains in the IMG/M database, including all  
309 three-previously recognised *P. aeruginosa* lineages (33-34), group 1 represented by strain  
310 PAO1, group 2 represented by strain PA14 and group 3 represented by strain PA7 (**Figure**  
311 **3, Suppl. Table S2**). Indeed, this remodelling pathway is prevalent in many *Pseudomonas*  
312 groups, including the plant pathogen *Pseudomonas syringae*. To investigate whether the  
313 PlcP-Agt lipid remodelling pathway is involved in host-pathogen interactions, we analysed  
314 metatranscriptomic datasets from cystic fibrosis patients, where *P. aeruginosa* is known  
315 to be prevalent in the fatal exacerbation period before patient death (25). To the best of  
316 our knowledge, only two studies have reported the metatranscriptome of the bacterial  
317 community present in CF sputum (25, 26). Indeed, *phoBR* and *pstS* are amongst the most  
318 highly expressed genes, confirming previous observations that *P. aeruginosa* is Pi-limited  
319 during human airway epithelia infection (36, 37). Interestingly, the alkaline phosphatase  
320 *phoA* (38) was highly expressed in sputum from CF patients but not from wound samples  
321 which was also dominated by *P. aeruginosa*. Importantly, the transcripts of *P. aeruginosa*  
322 *agt1/plcP/agt2* are highly expressed in CF sputum during the fatal exacerbation period  
323 before death (**Figure 2d**). Therefore, our phylogenomic and metatranscriptomic analyses  
324 suggest that not only is the PlcP-Agt lipid remodelling pathway strictly conserved and  
325 prevalent in *P. aeruginosa*, but also the corresponding genes are also highly expressed  
326 during CF patient infection, suggesting a potential role for lipid renovation in host-  
327 pathogen interactions.

328

329 **Experimental validation of the lipid renovation pathway for glycolipid formation in**  
330 ***P. aeruginosa***

331 To validate the function of these two putative glycosyltransferases (Agt1, Agt2) in the  
332 formation of glycolipids, we synthesized the codon-optimized genes (PA3218 and  
333 PA0842, respectively) for recombinant expression in *Escherichia coli*. The total lipidomes  
334 from the recombinant *E. coli* strains were then analysed by HPLC-MS to determine the  
335 presence of glycolipids in a gain-of-function assay. Expression of *P. aeruginosa* Agt1  
336 (PA3218) was sufficient for the production of MGDG (eluted at 7.7 min) in *E. coli*,  
337 confirmed through MS<sup>n</sup> fragmentation (**Figure 4a**). No UGL nor GADG was observed in  
338 the lipidome of this Agt1-overexpressing *E. coli* strain. Expressing Agt2 (PA0842) from *P.*  
339 *aeruginosa* in *E. coli* was sufficient for the accumulation of the GADG glycolipid (eluted at  
340 9.8 min), also confirmed through the MS<sup>n</sup> fragmentation pattern (**Figure 4b**). Equally, no  
341 UGL nor MGDG was observed in the Agt2-overexpressing *E. coli* strain. Production of  
342 these glycolipids was not observed in the same strain of *E. coli* transformed with an empty  
343 vector control (pET28a). It is therefore likely that UGL production is carried out by another  
344 glycosyltransferase, the identity of which remains to be discovered.

345 To confirm the role of Agt1 and Agt2 in the production of MGDG and GADG, we  
346 purified Agt1 and Agt2 from recombinant *E. coli* (**Figure 4c**) and carried out enzyme  
347 assays using UDP-glucose and UDP-glucuronic acid as the sugar donor and DAG as the  
348 acceptor. Agt1 can only accept UDP-glucose as the substrate with an affinity of  $K_m=298.1$   
349  $\pm 9.5 \mu\text{M}$  (**Figure 4c**, middle panel) and produced MGDG as expected (**Figure 4d**, left  
350 panel). Similarly, Agt2 can use UDP-glucuronic acid as the substrate ( $K_m= 373.0 \pm 12.9$   
351  $\mu\text{M}$  (**Figure 4c**, right panel), producing the GADG lipid (**Figure 4d**, right panel).  
352 Interestingly, the purified Agt2 enzyme can also use UDP-glucose to some extent with a  
353  $K_m$  of  $480 \mu\text{M}$  (data not shown) although the corresponding lipid MGDG was not observed  
354 in the lipid extract from the lipidome of the recombinant host *E. coli* (**Figure 4b**).

355 To further confirm the role of these genes in *P. aeruginosa* glycolipid biosynthesis  
356 we analysed the lipidomes of mutants in  $\Delta plcP$ ,  $\Delta agt1$  and  $\Delta agt2$  in strain PAO1 (**Figure**

357 **5a, b**). Differences were analysed by searching for the intact masses of the glycolipids  
358 MGDG and GADG: 774.6 *m/z* and 788.6 *m/z* in positive ionisation mode with an  
359 ammonium adduct, respectively. As expected, under Pi stress MGDG is no longer  
360 produced in the  $\Delta agt1$  mutant and similarly GADG is no longer produced in the  $\Delta agt2$   
361 mutant (**Figure 5a**). In the  $\Delta plcP$  mutant, no MGDG was found and the GADG lipid was  
362 significantly reduced but not entirely abolished (**Figure 5b**). The small amount of GADG  
363 produced in the  $\Delta plcP$  mutant suggests that an alternative supply of DAG (independent of  
364 the degradation of phospholipids by PlcP) is available in this mutant. Nevertheless,  
365 lipidome analyses of the  $\Delta plcP$ ,  $\Delta agt1$  and  $\Delta agt2$  mutants strongly supports the key role  
366 of this PlcP-Agt pathway (**Figure 2A**) in lipid renovation in *P. aeruginosa*.

367

### 368 **The protective role of glycolipids to antibiotic resistance in *Pseudomonas*** 369 ***aeruginosa***

370 To assess whether the growth of the glycolipid-deficient mutants ( $\Delta plcP$ ,  $\Delta agt1$ ,  $\Delta agt2$ )  
371 was affected by Pi stress, we grew the mutants in the defined minimal medium under high  
372 and low Pi conditions. However, no significant difference in growth rates was found (Suppl.  
373 Figure S1). The presence of glycolipids in the membrane may, however, have a profound  
374 impact on the functioning of the membrane during Pi stress. For example, PG is an anionic  
375 lipid with net negative charges whereas MGDG has a neutral charged sugar group.  
376 Although a PG-to-GADG substitution may not necessarily change membrane charge (35),  
377 it may affect membrane curvature and the packing density of lipids. Thus, subsequent  
378 knock-on effects in membrane function might be expected (10). We therefore set out to  
379 investigate whether membrane lipid composition may have an impact on antibiotic  
380 resistance in *P. aeruginosa*. As cationic antimicrobial peptides directly interact with  
381 bacterial cell membranes, we focused on the impact of lipid remodelling on the killing  
382 activity of polymyxin B. We conducted the analyses under P-depleted conditions, since



383 Pi-stress is clinically important, already known to induce the expression of virulence  
384 factors (15, 17, 18, 29), and our own analysis confirmed that an array of genes involved  
385 in phosphate acquisition and lipid remodelling in *P. aeruginosa* are indeed highly  
386 expressed in sputum samples from lung microbiome of CF patients (**Figure 2d**).  
387 Polymyxins represent the drug-of-last resort for effectively treating carbapenem-resistant  
388 *P. aeruginosa* infections (3, 39).

389 To test the sensitivity of the mutants in the PlcP-Agt pathway to polymyxin B, we  
390 compared WT and mutants using kill curve analyses as the typically used disk diffusion  
391 method does not work efficiently for cationic antimicrobials (40). Indeed, there was a  
392 significant decrease in the survival of all three PAO1 glycolipid synthesis mutants ( $\Delta plcP$ ,  
393  $\Delta agt1$  and  $\Delta agt2$ ) compared to the wild type when challenged with polymyxin B,  
394 suggesting a protective role of glycolipids in polymyxin B resistance (**Figure 5c**). Such a  
395 protective role of glycolipids in polymyxin B resistance was not observed for other  
396 antibiotics, including ciprofloxacin, gentamicin, ceftazidime and meropenem (data not  
397 shown). *P. aeruginosa* is known to enhance its resistance to polymyxins through  
398 decoration of its lipopolysaccharide (LPS) layer using either 4-amino-4-deoxy-L-arabinose  
399 (L-Ara4N) by *arnB* (5), or the addition of phosphoethanolamine (pEtN) by *eptA* (6). It is  
400 thought that these changes perturb the electrostatic interaction between the cationic  
401 polymyxin B and the normally negatively charged LPS. To investigate whether these  
402 mechanisms play a role in the glycolipid-deficient mutants, we conducted a comparative  
403 proteomics analysis of the  $\Delta plcP$  mutant and WT under Pi depleted conditions, which  
404 revealed only a small number of differentially expressed proteins (**Suppl. Table S3**). The  
405 majority of these differentially expressed proteins are uncharacterised. However,  
406 importantly, LPS modification enzymes previously found to confer antimicrobial peptide  
407 resistance, such as ArnB and EptA, were not differentially expressed between the WT and  
408  $\Delta plcP$  mutant. Therefore, our data suggests that it is the glycolipids that are the major



409 contributor to increased polymyxin B resistance, which constitutes a new biological  
410 mechanism for polymyxin resistance. To this end, we tested the resistance to polymyxin  
411 B of recombinant *E. coli* strains overexpressing *P. aeruginosa* Agt1 and Agt2, that produce  
412 MGDG and GADG, respectively (**Figure 4a, 4b**). Indeed, in this gain-of-function assay,  
413 both Agt1 and Agt2 overexpressing *E. coli* strains had enhanced resistance to polymyxin  
414 B compared to the empty vector control (**Figure 5d**), supporting the protective role of  
415 these glycolipids to antimicrobial peptides.

416

417 To conclude, we present here the discovery of novel glycolipids produced in *P.*  
418 *aeruginosa* during adaption to phosphorus stress. This lipid renovation pathway is strictly  
419 conserved in all *P. aeruginosa* isolates to date and highly expressed in the  
420 metatranscriptome of CF patients, suggesting a key role of lipid remodelling in the  
421 ecophysiology of this bacterium. Interestingly, lipid remodelling as a response to survive  
422 phosphorus stress in turn comes with trade-offs in terms of antibiotic resistance; these  
423 glycolipids may protect the bacterium from insult by cationic antimicrobial peptides,  
424 highlighting a new resistance mechanism to polymyxin B which has been previously  
425 overlooked. It remains to be seen whether the altered susceptibility to polymyxin B is the  
426 sole trade-off following lipid remodelling of phospholipids to glycolipids. After all, evolution  
427 appears to have selected phospholipids as the dominant lipids in the last universal  
428 common ancestor (12).

429

### 430 **Acknowledgements**

431 This work was funded by an MRC Doctoral Training Partnership studentship in  
432 Interdisciplinary Biomedical Research (MR/J003964/1) awarded to RAJ and by a Royal  
433 Society International Exchanges 2017 Cost Share (China) award (IEC\NSFC\170213; grant  
434 agreement no. 170213). AM and YC are supported by a European Research Council (ERC)

435 award under the European Union's Horizon 2020 research and innovation programme  
436 (grant agreement no. 726116). We also thank the Proteomics Research Technology  
437 Platform, University of Warwick, UK for their contribution.

438

439 **Competing interest**

440 The authors declare no competing interests.

## 441 References

- 442 1. Murray, T. S., Egan, M., & Kazmierczak, B. I. (2007). *Pseudomonas aeruginosa*  
443 chronic colonization in cystic fibrosis patients. *Curr. Opin. Pediatr.*, 19: 83-88.
- 444 2. Gaynes, R., Edwards, J. R., & System, N. N. I. S. (2005). Overview of nosocomial  
445 infections caused by Gram-negative bacilli. *Clin. Infect. Dis.*, 41:848–854.
- 446 3. Hawkey PM, Livermore DM (2012). Carbapenem antibiotics for serious infections.  
447 *BMJ*. 344:e3236.
- 448 4. Landman, D., Georgescu, C., Martin, D. A., & Quale, J. (2008). Polymyxins  
449 revisited. *Clin. Microbiol. Rev.* 21:449–465.
- 450 5. Chung, E. S., Lee, J. Y., Rhee, J. Y., & Ko, K. S. (2017). Colistin resistance in  
451 *Pseudomonas aeruginosa* that is not linked to *arnB*. *J. Med. Microbiol.*, 66:833–  
452 841.
- 453 6. Nowicki, E. M., O'Brien, J. P., Brodbelt, J. S., & Trent, M. S. (2015). Extracellular  
454 zinc induces phosphoethanolamine addition to *Pseudomonas aeruginosa* lipid A  
455 via the ColRS two-component system. *Mol. Microbiol.* 97:166–178.
- 456 7. Parsons JB, Rock CO. (2013) Bacterial lipids: metabolism and membrane  
457 homeostasis. *Prog. Lipid Res.* 52:249-276.
- 458 8. Zhang, Y.-M., & Rock, C. O. (2008). Membrane lipid homeostasis in bacteria. *Nat.*  
459 *Rev. Microbiol.* 6:222–233.
- 460 9. van Meer G, Voelker DR, Feigenson GW. (2008) Membrane lipids: where they are  
461 and how they behave. *Nat. Rev. Mol. Cell Biol.* 9:112-124.
- 462 10. Harayama T, Riezman H. (2018) Understanding the diversity of membrane lipid  
463 composition. *Nat. Rev. Mol. Cell Biol.* 19:281-296.
- 464 11. May, K.L., & Silhavy T.J. (2017) Making a membrane on the other side of the wall.  
465 *Biochim. et Biophys. Acta.* 1862:1386-1393.
- 466 12. Lombard J, López-García P, Moreira D. (2012) The early evolution of lipid  
467 membranes and the three domains of life. *Nat. Rev. Microbiol.* 10:507-515.
- 468 13. Peretó J, López-García P, Moreira D. (2004) Ancestral lipid biosynthesis and early  
469 membrane evolution. *Trends Biochem. Sci.* 29:469-477.
- 470 14. Sahonero-Canavesi DX, López-Lara IM, Geiger O (2019) Membrane lipid  
471 degradation and lipid cycles in microbes. In *Aerobic Utilization of Hydrocarbons,*  
472 *Oils, and Lipids*, 10.1007/978-3-319-50418-6\_38
- 473 15. Lamarche MG, Wanner BL, Crépin S, Harel J. (2008) The phosphate regulon and  
474 bacterial virulence: a regulatory network connecting phosphate homeostasis and  
475 pathogenesis. *FEMS Microbiol. Rev.* 32:461-473.

- 476 **16.** Long, J., Zaborina, O., Holbrook, C., Zaborin, A., & Alverdy, J. (2008). Depletion of  
477 intestinal phosphate after operative injury activates the virulence of *P. aeruginosa*  
478 causing lethal gut-derived sepsis. *Surgery*, 144:189–197.
- 479 **17.** Francis VI, Stevenson EC, Porter SL. (2017) Two-component systems required for  
480 virulence in *Pseudomonas aeruginosa*. *FEMS Microbiol. Lett.* 364(11). doi:  
481 10.1093/femsle/fnx104.
- 482 **18.** Bains, M., Fernández, L., & Hancock, R. E. W. (2012). Phosphate starvation  
483 promotes swarming motility and cytotoxicity of *Pseudomonas aeruginosa*. *Appl.*  
484 *Environ. Microbiol.*, 78:6762–6768.
- 485 **19.** Son, M. S., Matthews, W. J., Kang, Y., Nguyen, D. T., & Hoang, T. T. (2007). *In*  
486 *vivo* evidence of *Pseudomonas aeruginosa* nutrient acquisition and pathogenesis  
487 in the lungs of cystic fibrosis patients. *Infect. Immun.* 75:5313–5324.
- 488 **20.** Lidbury, I. D. E. A., Murphy, A. R. J., Scanlan, D. J., Bending, G. D., Jones, A. M.  
489 E., Moore, J. D., et al., (2016). Comparative genomic, proteomic and exoproteomic  
490 analyses of three *Pseudomonas* strains reveals novel insights into the phosphorus  
491 scavenging capabilities of soil bacteria. *Environ. Microbiol.* 18:3535–3549.
- 492 **21.** Sebastián, M., Smith, A. F., González, J. M., Fredricks, H. F., Van Mooy, B.,  
493 Koblížek, M., et al., (2016). Lipid remodelling is a widespread strategy in marine  
494 heterotrophic bacteria upon phosphorus deficiency. *ISME J.* 10:968–978.
- 495 **22.** Smith AF, Rihtman B, Stirrup R, Silvano E, Mausz MA, Scanlan DJ, Chen Y. (2019)  
496 Elucidation of glutamine lipid biosynthesis in marine bacteria reveals its importance  
497 under phosphorus deplete growth in *Rhodobacteraceae*. *ISME J.* 13:39-49.
- 498 **23.** Shropshire H, Jones RA, Aguilo-Ferretjans MM, Scanlan DJ, Chen Y. (2021)  
499 Proteomics insights into the *Burkholderia cenocepacia* phosphorus stress  
500 response. doi.org/10.1111/1462-2920.15451.
- 501 **24.** Bailey TL, Elkan C (1994) Fitting a mixture model by expectation maximization to  
502 discover motifs in biopolymers. *Proceedings of the Second International*  
503 *Conference on Intelligent Systems for Molecular Biology*, 28-36, AAAI Press,  
504 Menlo Park, Californias.
- 505 **25.** Cobián Güemes AG, Lim YW, Quinn RA, Conrad DJ, Benler S, Maughan H,  
506 Edwards R, et al. (2019) Cystic fibrosis rapid response: translating multi-omics data  
507 into clinically relevant information. *mBio.* 16;10(2):e00431-19.
- 508 **26.** Cornforth DM, Dees JL, Ibberson CB, Huse HK, Mathiesen IH, Kirketerp-Moller K,  
509 et al., (2018) *Pseudomonas aeruginosa* transcriptome during human infection. *Proc.*  
510 *Nat. Acad. Sci. USA* 115:E5125-5134.

- 511 **27.** Jones, H.J., Krober, E., Stephenson, J., Mausz M.A., Jameson, E., Millard, A.,  
512 Purdy, K.J., Chen, Y. (2019) A new family of uncultivated bacteria involved in  
513 methanogenesis from the ubiquitous osmolyte glycine betaine in coastal saltmarsh  
514 sediments. *Microbiome*. 7, 120. doi.org/10.1186/s40168-019-0732-4
- 515 **28.** Kim, S. K., Park, S. J., Li, X. H., Choi, Y. S., Im, D. S., & Lee, J. H. (2018). Bacterial  
516 ornithine lipid, a surrogate membrane lipid under phosphate-limiting conditions,  
517 plays important roles in bacterial persistence and interaction with host. *Environ.*  
518 *Microbiol.* 20:3992–4008.
- 519 **29.** Lewenza, S., Falsafi, R., Bains, M., Rohs, P., Stupak, J., Sprott, G. D., & Hancock,  
520 R. E. W. (2011). The *olsA* gene mediates the synthesis of an ornithine lipid in  
521 *Pseudomonas aeruginosa* during growth under phosphate-limiting conditions, but  
522 is not involved in antimicrobial peptide susceptibility. *FEMS Microbiol. Lett.* 320:  
523 95–102.
- 524 **30.** Wilton M, Halverson TW, Charron-Mazenod L, Parkins MD, Lewnza S. (2018)  
525 Secreted phosphatase and deoxyribonuclease are required by *Pseudomonas*  
526 *aeruginosa* to defend against neutrophil extracellular traps. *Infect. Immun*  
527 86:e00403-18.
- 528 **31.** Wei, T., Quareshy, M., Zhang, Y. Z., Scanlan, D. J., & Chen, Y. (2018). Manganese  
529 is essential for PlcP metallophosphoesterase activity involved in lipid remodeling  
530 in abundant marine heterotrophic bacteria. *Appl. Environ. Microbiol.* 84, e01109-  
531 18.
- 532 **32.** Zavaleta-Pastor, M., Sohlenkamp, C., Gao, J.-L., Guan, Z., Zaheer, R., Finan, T.  
533 M., et al., (2010). *Sinorhizobium meliloti* phospholipase C required for lipid  
534 remodeling during phosphorus limitation. *Proc. Nat. Acad. Sci. USA*107:302–307.
- 535 **33.** Freschi L, Jeukens J, Kukavica-Ibrulj I, Boyle B, Dupont MJ, Laroche J, et al.,  
536 (2015) Clinical utilization of genomics data produced by the international  
537 *Pseudomonas aeruginosa* consortium. *Front Microbiol.* 29;6:1036. doi:  
538 10.3389/fmicb.2015.01036.
- 539 **34.** Ozer EA, Nnah E, Didelot X, Whitaker RJ, Hauser AR. (2019) The population  
540 structure of *Pseudomonas aeruginosa* is characterized by genetic isolation of  
541 *exoU+* and *exoS+* lineages. *Genome Bio. Evol.* 11:1780-1796.
- 542 **35.** Diercks H, Semeniuk A, Gisch N, Moll H, Duda KA, Hölzl G. (2015) Accumulation  
543 of novel glycolipids and ornithine lipids in *Mesorhizobium loti* under phosphate  
544 deprivation. *J. Bacteriol.* 197:497-509.
- 545 **36.** Chugani, SA and Greenberg, EP (2007) The influence of human respiratory

- 546 epithelia on *Pseudomonas aeruginosa* gene expression. *Microb. Pathog.* 42: 29–  
547 35.
- 548 **37.** Frisk, A, Schurr, JR, Wang, G, Bertucci, DC, Marrero, L, Hwang, SH, et al. (2004)  
549 Transcriptome analysis of *Pseudomonas aeruginosa* after interaction with human  
550 airway epithelial cells. *Infect. Immun.* 72: 5433–5438.
- 551 **38.** Filloux A, Bally M, Soscia C, Murgier M, Lazdunski A (1988) Phosphate regulation  
552 in *Pseudomonas aeruginosa*: Cloning of the alkaline phosphatase gene and  
553 identification of *phoB* and *phoR*-like genes. *Mol. Gen. Genet.* 212(3):510-513.
- 554 **39.** Poirel L, Jayol A, Nordmann P. (2017) Polymyxins: antibacterial activity,  
555 susceptibility testing, and resistance mechanisms encoded by plasmids or  
556 chromosomes. *Clin. Microbiol. Rev.* 30:557-596.
- 557 **40.** Ezadi, F., Ardebili A., Mirnead R (2019) Antimicrobial susceptibility testing for  
558 polymyxins: challenges, issues, and recommendations. *J. Clin. Microbiol.* 57,  
559 e01390-18.
- 560 **41.** Monds RD, Newell PD, Schwartzman JA, O'Toole GA. (2006) Conservation of the  
561 Pho regulon in *Pseudomonas fluorescens* Pf0-1. *Appl. Environ. Microbiol.*  
562 72:1910-1924.
- 563 **42.** Semeniuk A, Sohlenkamp C, Duda K, Hölzl G. (2014) A bifunctional  
564 glycosyltransferase from *Agrobacterium tumefaciens* synthesizes monoglucosyl  
565 and glucuronosyl diacylglycerol under phosphate deprivation. *J. Biol. Chem.*  
566 289(14):10104-10114.
- 567 **43.** Minh BQ, Schmidt HA, Chernomor O, Schrempf D, Woodhams MD, von  
568 Haeseler A, et al. (2020) IQ-TREE 2: New models and efficient methods for  
569 phylogenetic inference in the genomic era. *Mol. Biol. Evol.* 37:1530–1534.
- 570

571 **Figure legends**

572 **Figure 1 Lipidomics analysis uncovers novel glycolipid formation in *Pseudomonas***  
573 ***aeruginosa* strain PAO1 in response to phosphorus limitation.**

574 **a)** Growth of strain PAO1 WT in minimal medium A containing 1 mM phosphate (+Pi, blue)  
575 or 50  $\mu$ M phosphate (-Pi, black) over 12 hours. Data are the average of 3 independent  
576 replicates.

577 **b)** Liberation of *para*-nitrophenol (*p*NP) from *para*-nitrophenol phosphate (*p*NPP) through  
578 alkaline phosphatase activity, under Pi-repleted (1 mM, black) and Pi-depleted (50  $\mu$ M,  
579 yellow) conditions. Error bars represent the standard deviation of three independent  
580 replicates.

581 **c)** Representative chromatograms in negative ionisation mode of the *P. aeruginosa*  
582 lipidome when grown under phosphorus stress (-Pi, black) compared to growth under  
583 phosphorus sufficient conditions (+Pi, orange). PG, phosphatidylglycerol; PE,  
584 phosphatidylethanolamine, OL, ornithine lipids. Lower panel: extracted ion  
585 chromatograms of three new glycolipid species in *P. aeruginosa* which are only produced  
586 during Pi-limitation (black, 1 mM; orange, 50  $\mu$ M). MGDG: monoglucosyldiacylglycerol,  
587 GADG: glucuronic acid-diacylglycerol and UGL: unconfirmed glycolipid.

588 **d)** Mass spectrometry fragmentation spectra of three glycolipid species present under Pi  
589 stress in *P. aeruginosa*, at retention times of 7.7 (*m/z* 774.7), 8.7 (*m/z* 786.7) and 9.8 (*m/z*  
590 788.6) minutes, respectively. Each spectrum depicts an intact lipid mass with an  
591 ammonium ( $\text{NH}_4^+$ ) adduct exhibiting neutral loss of a head group, yielding diacylglycerol  
592 (DAG) (595 *m/z*). Further fragmentation yields monoacylglycerols (MAG) with C16:0 or  
593 C18:1 fatty acyl chains.

594



595 **Figure 2 Comparative multi-omic analyses for the identification of the PlcP-Agt**  
596 **pathway responsible for glycolipid formation in *Pseudomonas aeruginosa* strain**  
597 **PAO1.**

598 **a)** The proposed pathway for lipid remodelling through the PlcP-Agt pathway. PlcP  
599 degrades membrane phospholipids such as PG, to generate diacylglycerol (DAG)  
600 intermediates for the formation of MGDG and GADG through the activity of  
601 glycosyltransferases, using either UDP-glucose or UDP-glucuronate as the co-substrate  
602 (42).

603 **b)** Volcano plot depicting differentially expressed proteins when comparing Pi-repleted  
604 and Pi-depleted conditions. Significantly upregulated proteins when under Pi stress are  
605 shown in red (left), and those that are significantly upregulated when Pi is sufficient are in  
606 green (right). Significance was accepted when the false discovery rate (FDR) was  $< 0.05$ ,  
607 and a fold change  $\geq 2$ .

608 **c)** Genomic organisation of predicted lipid remodelling genes in *P. aeruginosa*.  
609 Glycosyltransferases (orange) PA3218 (Agt1) and PA0842 (Agt2) are predicted to be  
610 involved in glycolipid synthesis. PA3219 is predicted to be PlcP in *P. aeruginosa*.  
611 Predicted Pho box sequences in the promoter regions (represented in blue boxes) of each  
612 glycosyltransferase operon from *P. aeruginosa* strains representing the PAO1 clade, the  
613 PA7 clade and the PA14 clade are shown. The black dots represent residues which are  
614 conserved in the Pho box consensus CTGTCATNNNNCTGTCAT (41).

615 **d)** Metatranscriptomic analysis of PlcP-Agt lipid remodelling genes in sputum samples  
616 from a cystic fibrosis patient 7-days (CF\_D-7) and 8-days (CF\_D-8) before death (25) and  
617 a Danish CF patient (CF\_Person G) (26) as well as a wound sample from a burns patient  
618 from the USA (Burn patient) (26). Relative abundance is expressed as RPKM (reads per



619 kilobase of transcript, per million mapped reads). PhoA (PA3296) encodes an alkaline  
620 phosphatase (38).

621  
622 **Figure 3 Occurrence of *plcP-agt* genes in major *Pseudomonas* groups.** The  
623 phylogeny of *Pseudomonas* clades was determined using the nucleotide sequences of six  
624 housekeeping genes (*rpoB*, *rpoD*, *dnaE*, *recA*, *atpD*, *gyrB*) retrieved from each genome  
625 using IQ-Tree (43). The filled colour indicates the presence of the genes in the genomes  
626 whereas a blank indicates the absence of the corresponding gene in the genomes. The  
627 two-component system PhoBR (black circles) is found in all genomes and the PlcP-  
628 Agt1/Agt2 are strictly conserved in all 770 genome-sequenced *P. aeruginosa* strains that  
629 form three clades represented by strain PA14, PA01 and PA7 respectively. Bootstrap  
630 values >75% are shown.

631  
632 **Figure 4, Characterization of glycolipid formation from recombinant Agt1 and Agt2.**

633 **a)** Extracted ion chromatogram of the MGDG lipid from recombinant *E. coli* expressing  
634 Agt1. An empty vector control is also shown (red line). The identity of MGDG is further  
635 validated using mass spectrometry fragmentation showing the neutral loss of 179  
636 corresponding to the loss of glucose and the formation of monoacylglycerols (MAG) with  
637 C16:0 or C18:1 (*m/z* 313.2, 339.3).

638 **b)** Extracted ion chromatogram of the GADG lipid from recombinant *E. coli* expressing  
639 Agt2. An empty vector control is also shown (red line). The identity of GADG is further  
640 validated using mass spectrometry fragmentation showing the neutral loss of 193  
641 corresponding to the loss of glucose and the formation of monoacylglycerols (MAG) with  
642 C16:0 or C18:1 (*m/z* 313.2, 339.2).

643 **c)** Purified Agt1 and Agt2 protein from recombinant *E. coli* (left panel) and Michaelis  
644 Menten kinetics of Agt1 towards UDP-glucose (middle panel) and Agt2 towards UDP-  
645 glucuronic acid (right panel) as substrate, respectively.

646 **d)** Mass spectrometry identification of MGDG and GADG produced from purified Agt1 and  
647 Agt2 using DAG and UDP-glucose and UDP-glucuronic acid as the substrate,  
648 respectively.

649

650 **Figure 5 Glycolipid formation in *P. aeruginosa* and mutants under Pi stress,**  
651 **showing a protective role of glycolipids to polymyxin B.**

652 **a-b)** Relative abundance of the glycolipid MGDG (**a**) and GADG (**b**) in *P. aeruginosa*  
653 mutants *plcP* (purple trace), *agt1* (blue trace) and *agt2* (green, trace) compared to the wild  
654 type (WT). Cells were cultivated under low Pi conditions (50  $\mu\text{M}$ ) and a representative  
655 extracted ion chromatogram of MGDG/GADG is shown between the WT, (black trace) and  
656 each mutant. The right most panel shows the abundance of MGDG or GADG calculated  
657 relative to an internal lipid standard d17:1/12:0 sphingosylphosphoethanolamine (Sigma-  
658 Aldrich) in the wild-type and mutant strains of *P. aeruginosa*. Values are calculated from  
659 three biological replicates and the error bars denote standard deviation. MGDG,  
660 monoglucosyldiacylglycerol, GADG, glucuronic acid-diacylglycerol.

661 **c)** Survival of glycolipid remodelling mutants  $\Delta plcP$  (purple),  $\Delta agt1$  (green) and  $\Delta agt2$   
662 (blue) when challenged with 4  $\mu\text{g mL}^{-1}$  polymyxin B compared to WT under Pi stress  
663 (black). All experiments were conducted under Pi stress conditions and the results are the  
664 average of three biological replicates; error bars denote standard deviation.

665 **d)** Survival of glycolipid producing *Escherichia coli* when challenged with 20  $\mu\text{g mL}^{-1}$   
666 polymyxin B. All experiments were conducted in three replicates and error bars denote

667 standard deviation. Black, *E. coli* containing the empty vector pET28a; green, *E. coli*

668 containing plasmid pET28a-Agt1; blue, *E. coli* containing plasmid pET28a-Agt2.

669

670 **Supplementary Figures and Tables**

671

672 **Suppl. Figure S1** Growth of the *P. aeruginosa* mutants in the minimal medium under Pi  
673 repleted and Pi depleted conditions.

674

675 **Suppl. Table S1** Proteomic analysis of differentially expressed proteins in the wild-type  
676 *P. aeruginosa* PAO1 in response to different Pi levels (1 mM versus 50  $\mu$ M).

677

678 **Suppl. Table S2** Protein BLAST identification of locus tags homologous to *agt1* and *agt2*  
679 glycolipid synthesis genes in all genome sequenced *P. aeruginosa* strains at the JGI IMG  
680 database.

681

682 **Suppl. Table S3** Proteomic analysis of wild type *P. aeruginosa* PAO1 versus the  $\Delta$ *plcP*  
683 mutant grown at 50  $\mu$ M Pi.

684

685 **Suppl. Table S4** Whole genome mapping to *Pseudomonas aeruginosa* PAO1 of  
686 metatranscriptomic datasets (SRX5145605, SRX5145606, SRR6833349) from sputum  
687 samples taken from cystic fibrosis patients and a patient with chronic wound infection  
688 (SRR6833340). **S4A** (SRX5145605), **S4B** (SRX5145606), **S4C** (SRR6833349), **S4D**  
689 (SRR6833340). RPKM, reads per kilobase of transcript per million mapped reads; FPKM,  
690 fragments per kilobase of transcript per million mapped reads.

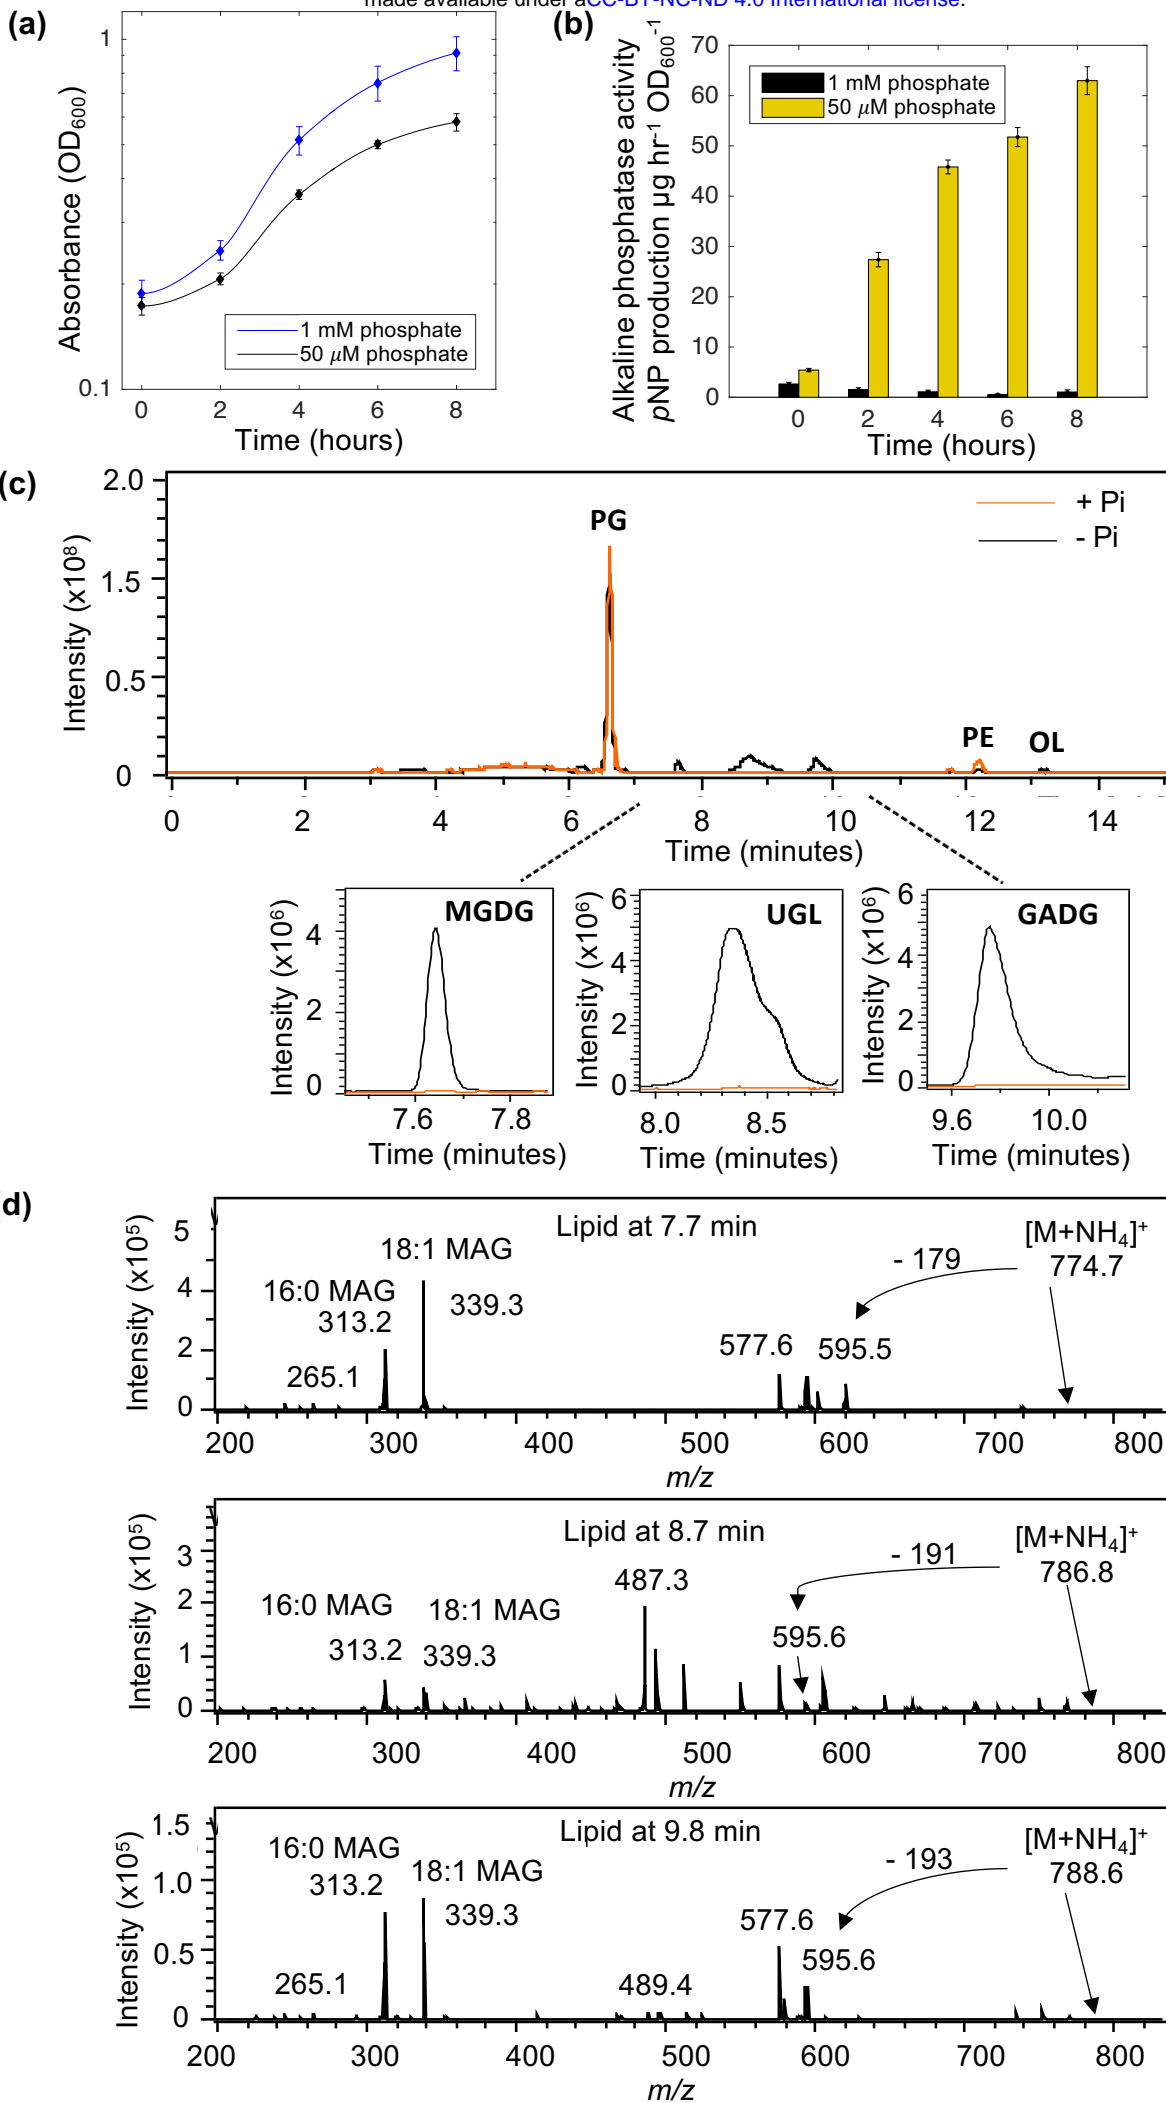

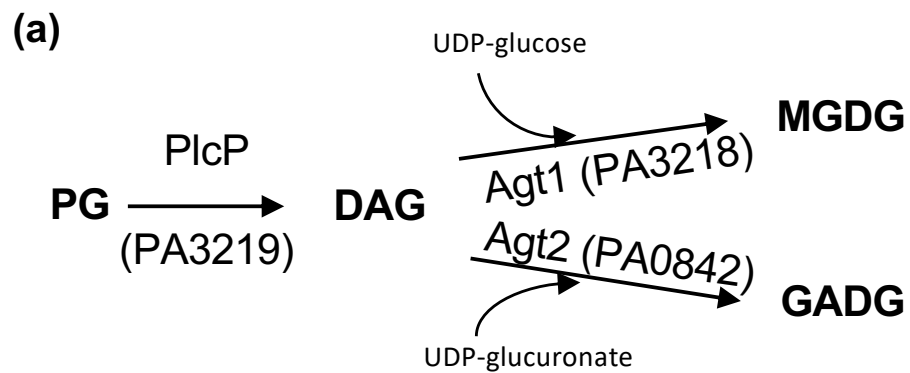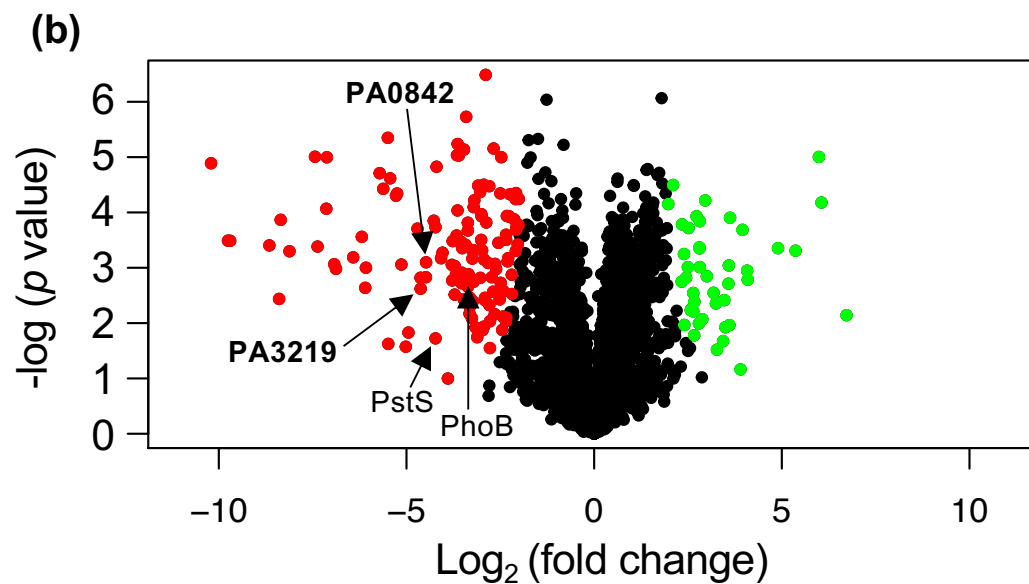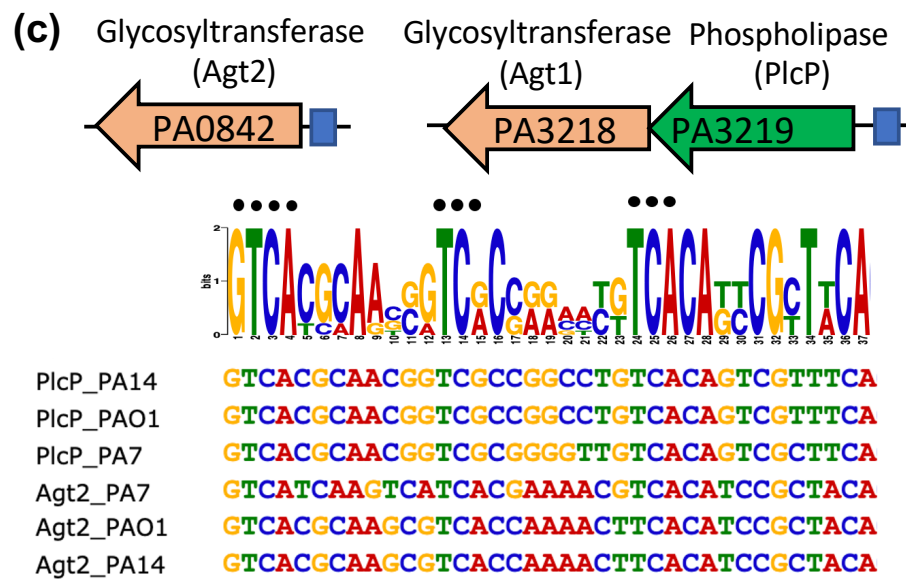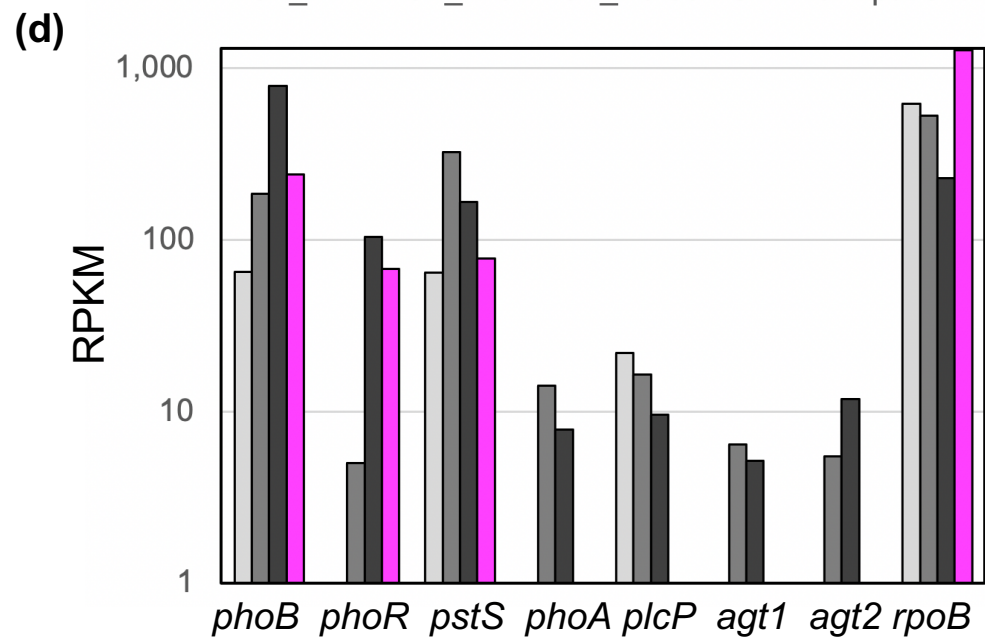

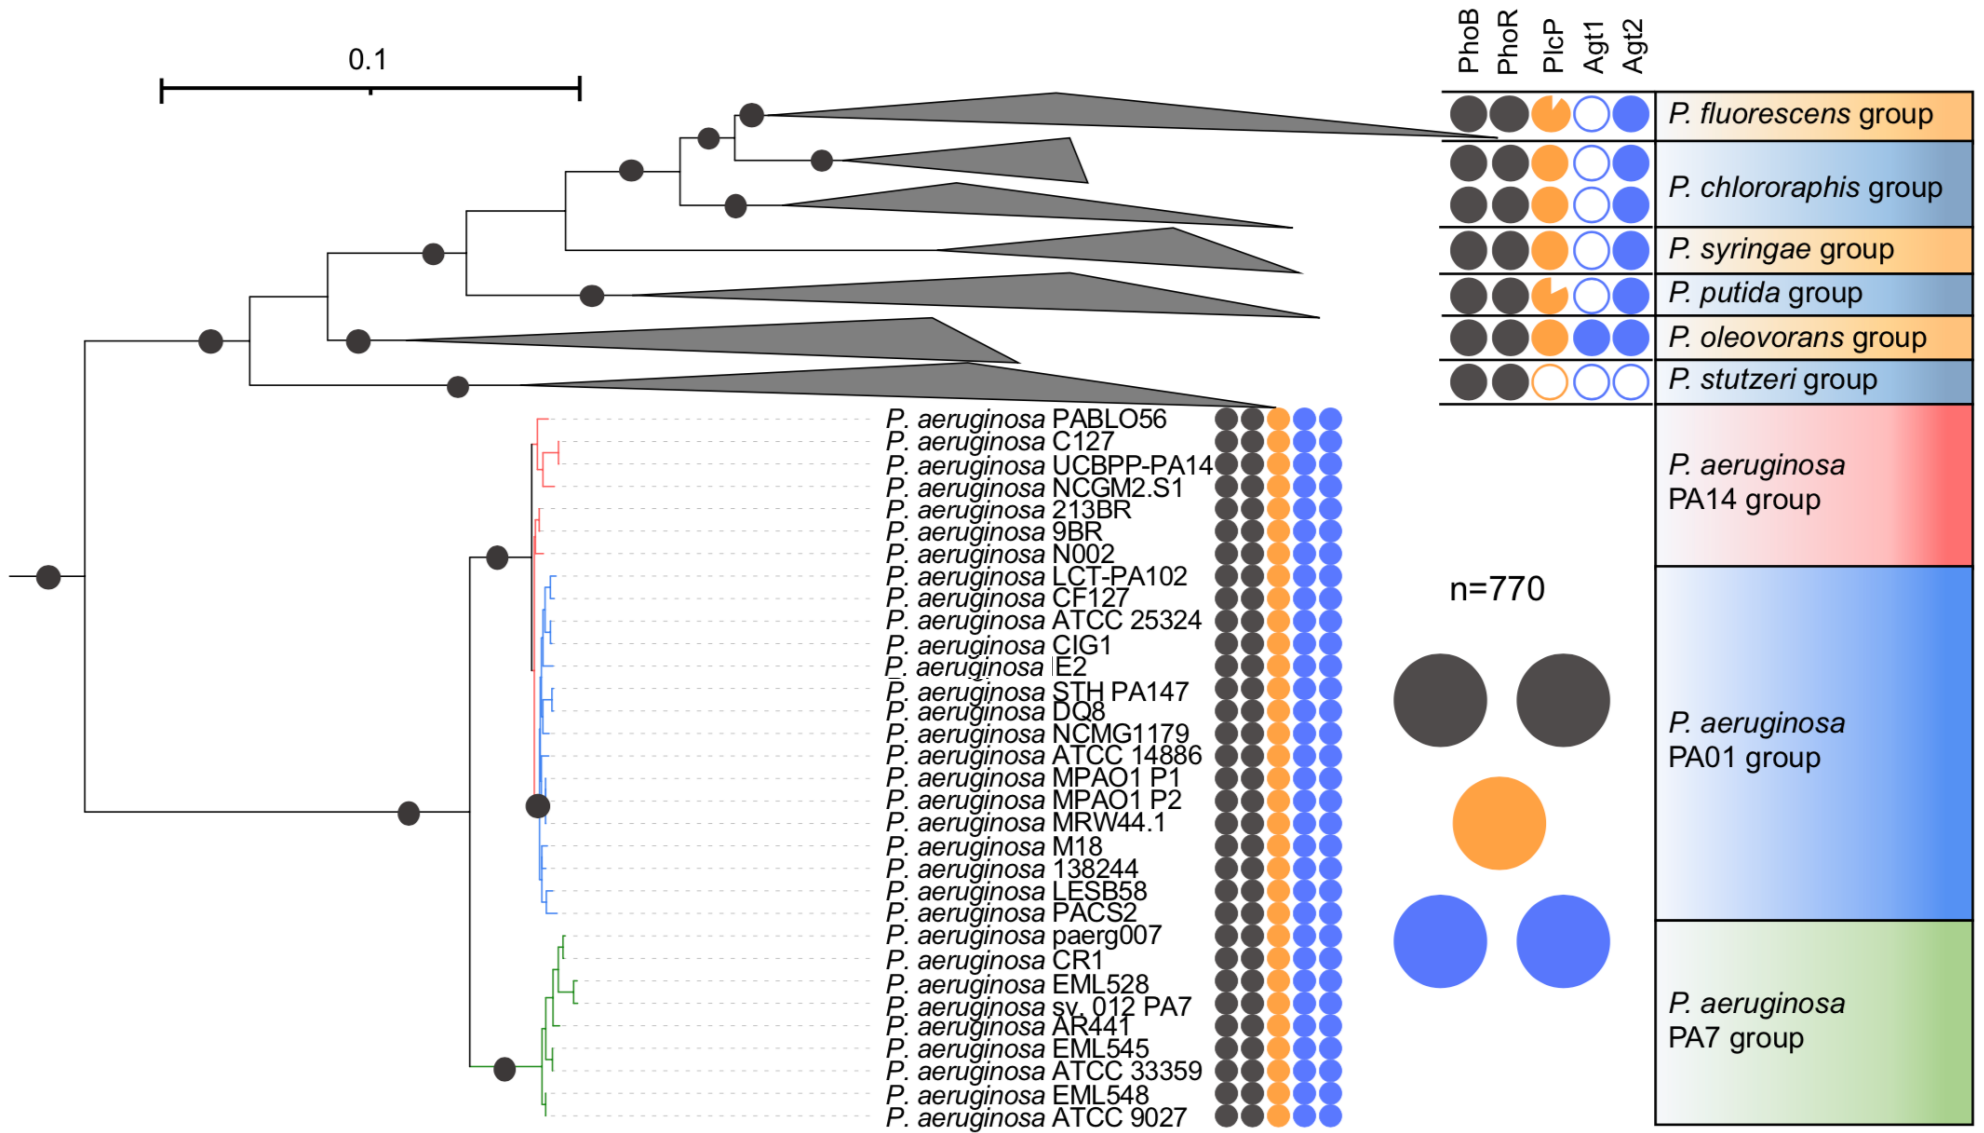

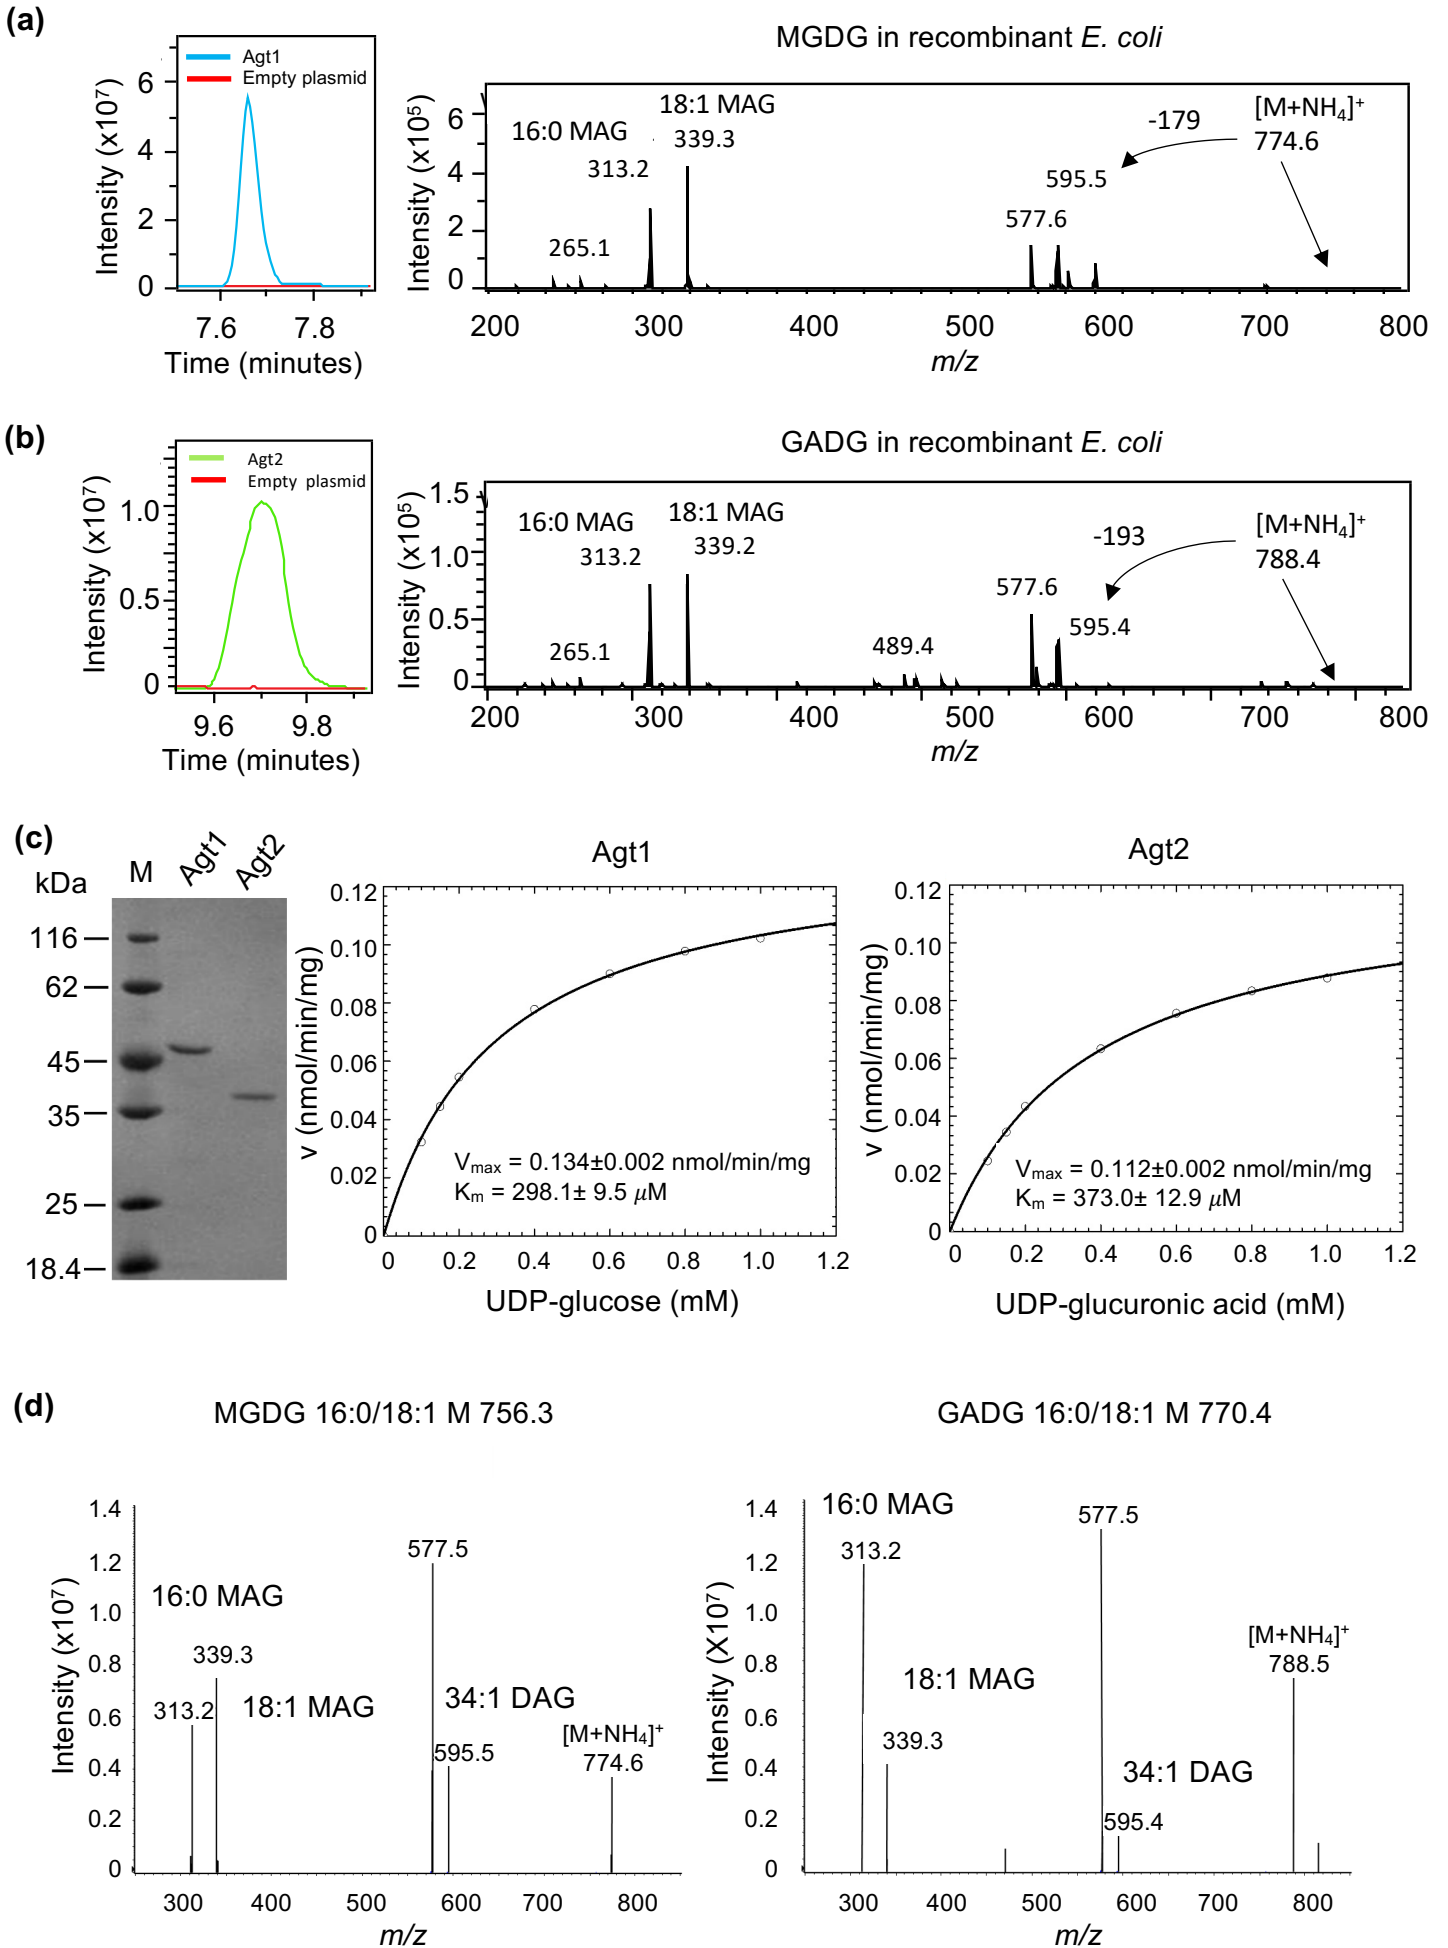



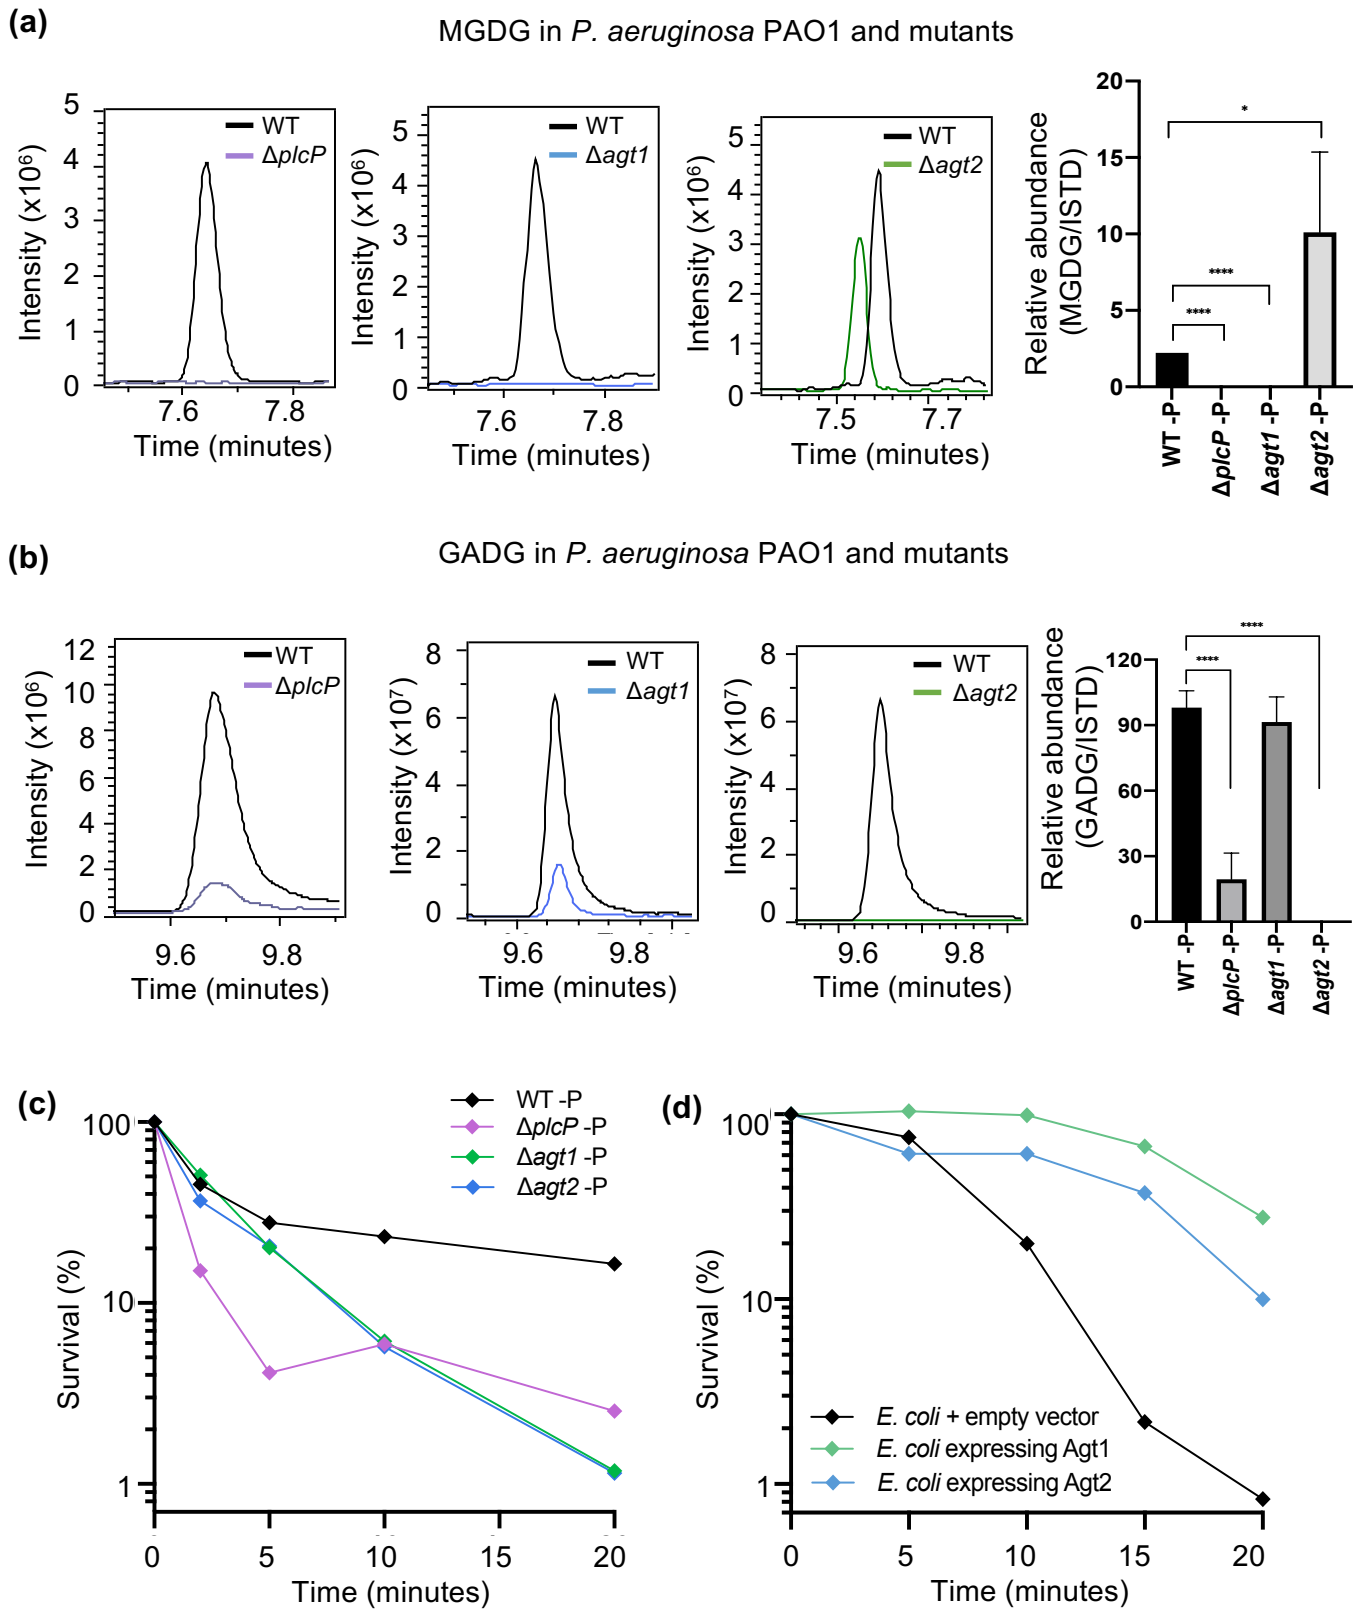

Source: https://biorxiv.org/content/10.1101/2021.04.14.439775v1.full.pdf
